# Supplementary material
Source: PubMed Central journal article supplement (PMC9167768)
Supplement: NIHMS1790438-supplement-1.pdf [file NIHMS1790438-supplement-1.pdf]

Running head: NEURAL CORRELATES OF EXPLORE-EXPLOIT SUPPLEMENT

**Title:** SUPPLEMENTARY MATERIALS: The neurocomputational bases of explore-exploit decision making.

**Author List:**

Jeremy Hogeveen<sup>1-2,9\*</sup>, Teagan S. Mullins<sup>1-2</sup>, John D. Romero<sup>1-2</sup>, Elizabeth Eversole<sup>1-2</sup>, Kimberly Rogge-Obando<sup>3</sup>, Andrew R. Mayer<sup>1,4-6</sup>, & Vincent D. Costa<sup>7-8\*</sup>

**Affiliations:**

1. Department of Psychology, University of New Mexico, Albuquerque NM 87131 USA.
2. Psychology Clinical Neuroscience Center, University of New Mexico, Albuquerque NM 87131 USA.
3. Department of Biomedical Engineering, Vanderbilt University, Nashville TN 37235 USA.
4. Department of Psychiatry & Behavioral Sciences, University of New Mexico School of Medicine, Albuquerque NM 87131 USA.
5. Department of Neurology, University of New Mexico School of Medicine, Albuquerque NM 87131 USA.
6. The Mind Research Network/Lovelace Biomedical Research Institute, Pete & Nancy Domenici Hall, Albuquerque NM 87106 USA
7. Department of Behavioral Neuroscience, Oregon Health and Science University, Portland OR 97239 USA.
8. Division of Neuroscience, Oregon National Primate Research Center, Beaverton OR 97006USA.

\* **Co-Corresponding Authors:** Jeremy Hogeveen, [jhogeveen@unm.edu](mailto:jhogeveen@unm.edu); Vincent D. Costa, [costav@ohsu.edu](mailto:costav@ohsu.edu).

**Footnote:**

9. Lead Contact.

### Inventory of Supplemental Information

#### Page 3. Supplementary Figures

- Page 3. Supplementary Figure 1: Bayesian multilevel modeling versus voxelwise analysis results overlays.
- Page 4. Supplementary Figure 2: Distribution of within-subjects associations between trialwise IEV and BONUS parameters.
- Page 5. Supplementary Figure 3:  $\hat{R}$  values for our IEV Bayesian multilevel models.

#### Page 6. Supplementary Tables

- Page 6. Supplementary Table 3: Summary table for Bayesian multilevel model results from the exploration BONUS model.
- Page 7. Supplementary Table 4: Summary table for Bayesian multilevel model results from the trials since novel model.
- Page 8. Supplementary Table 5: Summary table for Bayesian multilevel model results from the IEV model.

## Supplementary Figures

**Supplementary Figure 1. Overlays illustrating the spatial overlap between Bayesian multilevel modeling results versus conventional voxelwise modeling; Related to Figures 2A-B. (A)** Overlay of the exploration BONUS fMRI results derived from ROI-level Bayesian Multi-Level Modeling (BMLM; semitransparent parcels via **Figure 2A**) and conventional modeling using FSL's FLAME approach (height thresholded,  $|t| \geq 2$ ; warm and cool clusters reflect activation and deactivation, respectively). **(B)** Analogous visualization of the IEV maps (BMLM results via **Figure 2B**). Key findings reported in the main text all show highly similar results using conventional voxelwise modeling.

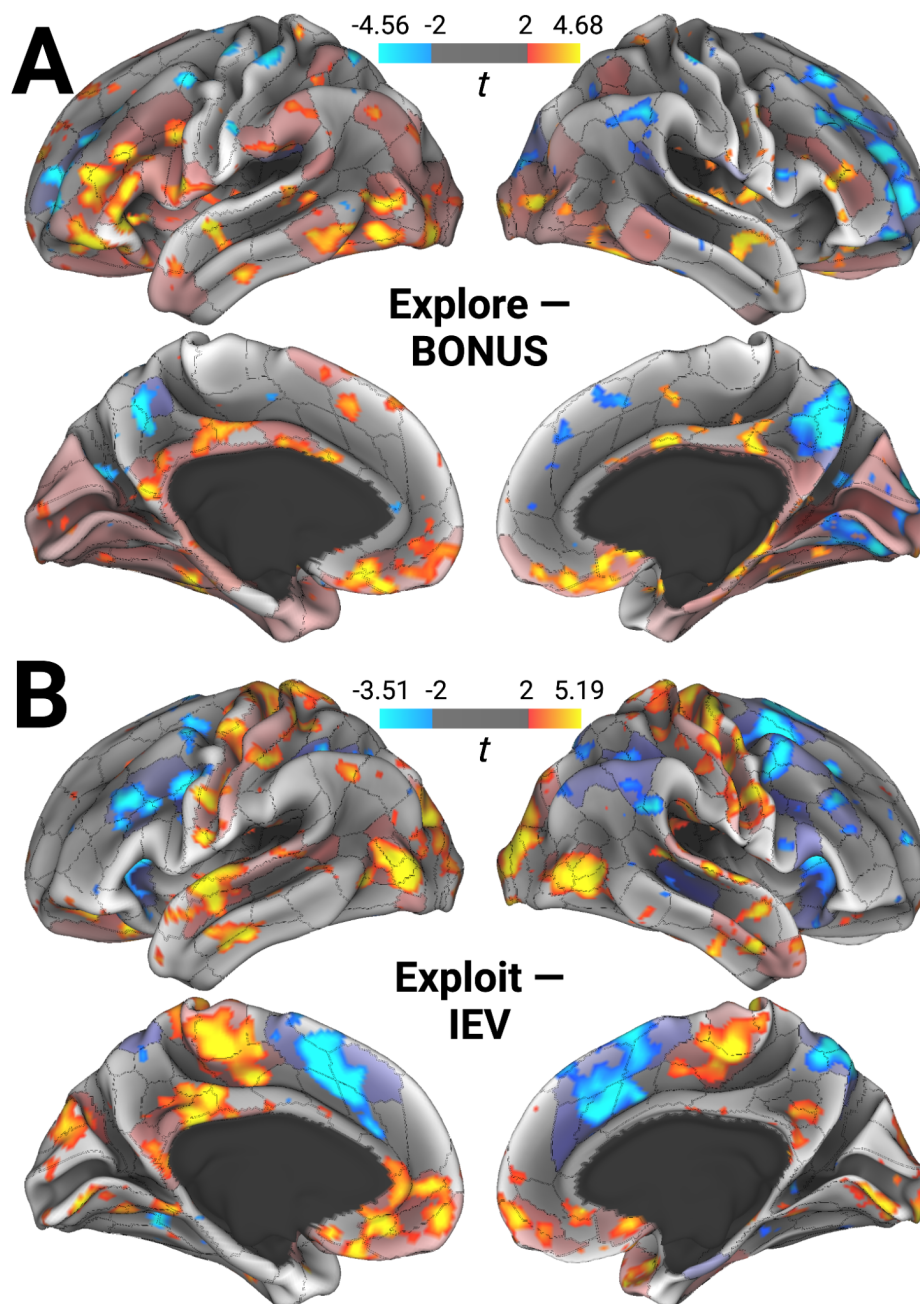

## NEURAL CORRELATES OF EXPLORE-EXPLOIT SUPPLEMENT

**Supplementary Figure 2. Distribution of within-subjects associations between trialwise IEV and BONUS parameters; Related to Figure 1J.** Histogram of the rank-ordered correlation between BONUS and IEV parameters within subjects (i.e., trial-level estimates). Overall, there was a small negative effect size for this relationship across the sample (Pink vertical lines:  $M_{\rho} = -0.11$ , 95%-CI = -0.17 to -0.05).

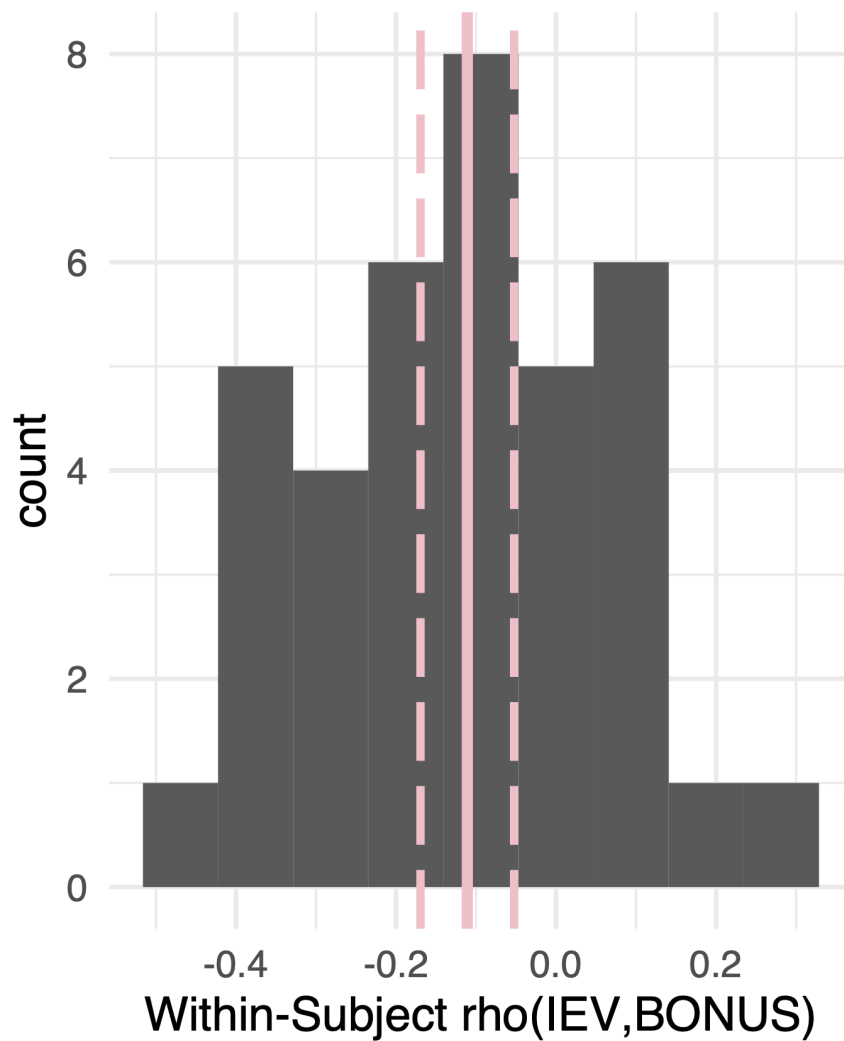

## NEURAL CORRELATES OF EXPLORE-EXPLOIT SUPPLEMENT

**Supplementary Figure 3. R values for our IEV Bayesian multilevel models; Related to Figures 2C and 3B.** (A) Original IEV Bayesian multilevel model demonstrated issues with model convergence (i.e., substantial portion of  $\hat{R} > 1.1$ ), but (B) this was resolved by doubling the number of iterations per MCMC chain in the model.

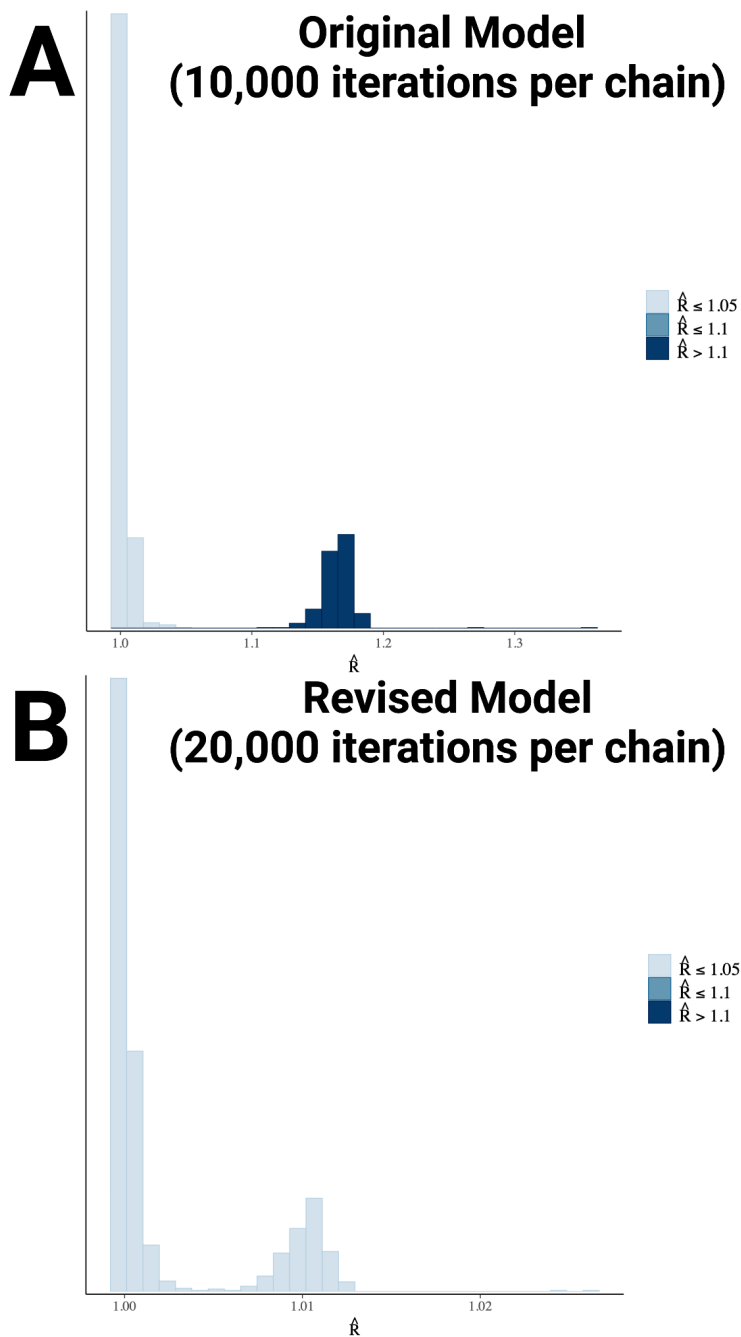

## NEURAL CORRELATES OF EXPLORE-EXPLOIT SUPPLEMENT

## Supplementary Tables

Supplementary Table 1. Summary table for Bayesian multilevel model results from the exploration BONUS model; Related to Figures 2A,C,D &amp; 3B-C.

| ROI                                 | Mean    | 10%-HDI | 90%-HDI | P+     |
|-------------------------------------|---------|---------|---------|--------|
| <b>Glasser Atlas ROIs</b>           |         |         |         |        |
| RH_p10p                             | -0.0282 | -0.0444 | -0.0126 | 0.0109 |
| LH_p10p                             | -0.0273 | -0.0436 | -0.0112 | 0.0143 |
| RH_31pd                             | -0.0128 | -0.0290 | 0.0029  | 0.1486 |
| LH_31pd                             | -0.0104 | -0.0261 | 0.0053  | 0.1937 |
| LH_d32                              | -0.0046 | -0.0204 | 0.0111  | 0.3569 |
| RH_d32                              | -0.0036 | -0.0191 | 0.0120  | 0.3861 |
| RH_p9-46v                           | -0.0009 | -0.0166 | 0.0146  | 0.4834 |
| RH_TE1a                             | -0.0002 | -0.0166 | 0.0158  | 0.5012 |
| LH_TE1a                             | 0.0027  | -0.0125 | 0.0181  | 0.5929 |
| LH_LIPd                             | 0.0036  | -0.0122 | 0.0191  | 0.6265 |
| RH_s32                              | 0.0118  | -0.0044 | 0.0281  | 0.8289 |
| RH_LIPd                             | 0.0137  | -0.0019 | 0.0292  | 0.8719 |
| LH_p9-46v                           | 0.0163  | 0.0004  | 0.0317  | 0.9057 |
| RH_IFSa                             | 0.0163  | 0.0010  | 0.0312  | 0.9143 |
| LH_OFC                              | 0.0170  | 0.0008  | 0.0335  | 0.9088 |
| RH_OFC                              | 0.0185  | 0.0019  | 0.0350  | 0.9254 |
| LH_FFC                              | 0.0246  | 0.0081  | 0.0416  | 0.9716 |
| RH_10v                              | 0.0248  | 0.0082  | 0.0411  | 0.9728 |
| LH_10v                              | 0.0302  | 0.0136  | 0.0466  | 0.9895 |
| LH_s32                              | 0.0318  | 0.0147  | 0.0489  | 0.9892 |
| LH_IFSa                             | 0.0439  | 0.0274  | 0.0602  | 0.9993 |
| RH_FFC                              | 0.0456  | 0.0282  | 0.0630  | 0.9990 |
| <b>Amygdala &amp; Striatal ROIs</b> |         |         |         |        |
| RH_Caudate                          | 0.0135  | -0.0023 | 0.0291  | 0.8655 |
| RH_Amygdala                         | 0.0162  | 0.0003  | 0.0324  | 0.9043 |
| LH_Caudate                          | 0.0195  | 0.0037  | 0.0355  | 0.9407 |
| RH_Putamen                          | 0.0237  | 0.0086  | 0.0389  | 0.9745 |
| LH_Amygdala                         | 0.0258  | 0.0083  | 0.0432  | 0.9685 |
| LH_Putamen                          | 0.0273  | 0.0121  | 0.0424  | 0.9858 |
| RH_Accumbens                        | 0.0365  | 0.0197  | 0.0528  | 0.9966 |
| LH_Accumbens                        | 0.0377  | 0.0203  | 0.0551  | 0.9962 |

## NEURAL CORRELATES OF EXPLORE-EXPLOIT SUPPLEMENT

**Supplementary Table 2. Summary table for Bayesian multilevel model results from the trials since novel model; Related to Figure 4.**

| ROI                                 | Mean       | 10%-HDI    | 90%-HDI    | P+     |
|-------------------------------------|------------|------------|------------|--------|
| <b>Glasser Atlas ROIs</b>           |            |            |            |        |
| RH_FFC                              | -0.2077017 | -0.2409486 | -0.1752499 | 0      |
| LH_FFC                              | -0.1308604 | -0.1643157 | -0.0979604 | 0      |
| RH_LIPd                             | -0.0902538 | -0.1218036 | -0.0591218 | 0.0002 |
| LH_p9-46v                           | -0.083345  | -0.115126  | -0.0520216 | 0.0003 |
| RH_p9-46v                           | -0.0798982 | -0.112082  | -0.0475908 | 0.0009 |
| LH_LIPd                             | -0.0744357 | -0.1049187 | -0.0433879 | 0.0012 |
| LH_OFC                              | -0.0590778 | -0.0932317 | -0.0251948 | 0.0152 |
| RH_OFC                              | -0.0469398 | -0.0790796 | -0.0151061 | 0.0326 |
| LH_d32                              | -0.0432189 | -0.072217  | -0.0140809 | 0.0301 |
| LH_IFSa                             | -0.0392896 | -0.0705753 | -0.0085442 | 0.0509 |
| RH_d32                              | -0.0376679 | -0.0674375 | -0.0083286 | 0.0507 |
| RH_31pd                             | -0.0351319 | -0.0669937 | -0.0041429 | 0.0737 |
| RH_p10p                             | -0.0321051 | -0.0625455 | -0.0018652 | 0.0878 |
| LH_TE1a                             | -0.0305596 | -0.0615345 | 0.0004637  | 0.1037 |
| LH_10v                              | -0.0207196 | -0.051067  | 0.01007264 | 0.1935 |
| RH_10v                              | -0.0189319 | -0.0489691 | 0.01119919 | 0.2103 |
| RH_TE1a                             | -0.0129331 | -0.0441046 | 0.01811886 | 0.2994 |
| RH_IFSa                             | -0.0118654 | -0.0428153 | 0.01868909 | 0.3118 |
| LH_p10p                             | -0.0109189 | -0.0417486 | 0.01973512 | 0.3215 |
| LH_s32                              | -0.0067546 | -0.0379082 | 0.02418382 | 0.3916 |
| RH_s32                              | -0.0036957 | -0.0349114 | 0.026797   | 0.4396 |
| LH_31pd                             | 0.00389361 | -0.0279889 | 0.03491998 | 0.5664 |
| <b>Amygdala &amp; Striatal ROIs</b> |            |            |            |        |
| LH_Caudate                          | -0.0451    | -0.0757    | -0.0151    | 0.0272 |
| RH_Caudate                          | -0.0449    | -0.0753    | -0.0146    | 0.0273 |
| LH_Putamen                          | -0.0443    | -0.0741    | -0.0144    | 0.0326 |
| RH_Amygdala                         | -0.0427    | -0.0743    | -0.0110    | 0.0422 |
| RH_Putamen                          | -0.0386    | -0.0684    | -0.0097    | 0.0459 |
| LH_Amygdala                         | -0.0351    | -0.0667    | -0.0039    | 0.0739 |
| LH_Accumbens                        | -0.0273    | -0.0595    | 0.0051     | 0.1371 |
| RH_Accumbens                        | -0.0234    | -0.0546    | 0.0076     | 0.1633 |

## NEURAL CORRELATES OF EXPLORE-EXPLOIT SUPPLEMENT

**Supplementary Table 3. Summary table for Bayesian multilevel model results from the immediate expected value (IEV) model; Related to Figures 2B,C,E & 3B,D.**

| ROI                                 | Mean       | 10%-HDI    | 90%-HDI    | P+       |
|-------------------------------------|------------|------------|------------|----------|
| <b>Glasser Atlas ROIs</b>           |            |            |            |          |
| LH_p9-46v                           | -0.0322014 | -0.0577246 | -0.0066319 | 0.052775 |
| RH_LIPd                             | -0.0229397 | -0.047948  | 0.00191723 | 0.117875 |
| RH_a32pr                            | -0.0227131 | -0.0473636 | 0.00193336 | 0.11885  |
| RH_p9-46v                           | -0.0226248 | -0.0475684 | 0.0022954  | 0.1221   |
| LH_LIPd                             | -0.0197795 | -0.0455936 | 0.00583524 | 0.160175 |
| LH_a32pr                            | -0.0129686 | -0.0374135 | 0.0113734  | 0.244075 |
| RH_FFC                              | -0.0112948 | -0.0357405 | 0.0129453  | 0.2781   |
| LH_IFSa                             | -0.0108276 | -0.0349651 | 0.0133167  | 0.2793   |
| RH_p10p                             | -0.0077168 | -0.0321858 | 0.01687802 | 0.3407   |
| LH_p10p                             | -0.005662  | -0.0303823 | 0.01919736 | 0.381175 |
| RH_IFSa                             | -0.0037181 | -0.0278281 | 0.0202894  | 0.418175 |
| LH_FFC                              | 0.00078033 | -0.0237762 | 0.02547304 | 0.513575 |
| RH_31pd                             | 0.0108444  | -0.0135932 | 0.03514682 | 0.714225 |
| RH_OFC                              | 0.01156084 | -0.0139042 | 0.03690653 | 0.720025 |
| LH_31pd                             | 0.01222642 | -0.0121791 | 0.03665595 | 0.7375   |
| LH_TE1a                             | 0.01255394 | -0.0115319 | 0.03664159 | 0.746075 |
| RH_s32                              | 0.01322229 | -0.0113345 | 0.03789295 | 0.756325 |
| RH_TE1a                             | 0.01622889 | -0.0085492 | 0.04120961 | 0.7971   |
| LH_10v                              | 0.01852123 | -0.0066186 | 0.04387368 | 0.825325 |
| LH_s32                              | 0.02011563 | -0.0046937 | 0.04513944 | 0.849625 |
| RH_10v                              | 0.02023952 | -0.0048466 | 0.04550662 | 0.848175 |
| LH_OFC                              | 0.02448317 | -0.0012374 | 0.05070502 | 0.8887   |
| <b>Amygdala &amp; Striatal ROIs</b> |            |            |            |          |
| RH_Caudate                          | -0.0136458 | -0.0382062 | 0.0110644  | 0.235325 |
| LH_Caudate                          | -0.0041888 | -0.028463  | 0.02004988 | 0.4083   |
| LH_Putamen                          | 0.00420839 | -0.0198342 | 0.02834883 | 0.59065  |
| RH_Putamen                          | 0.00473697 | -0.0192038 | 0.02878338 | 0.5976   |
| LH_Accumbens                        | 0.01665481 | -0.0090525 | 0.04248281 | 0.797025 |
| LH_Amygdala                         | 0.01683057 | -0.0083277 | 0.04257793 | 0.79995  |
| RH_Amygdala                         | 0.02229619 | -0.0032859 | 0.04807117 | 0.8666   |
| RH_Accumbens                        | 0.03376267 | 0.00746134 | 0.06054344 | 0.950575 |
